# Supplementary material for: External validation of the GRACE risk score and the risk–treatment paradox in patients with acute coronary syndrome
Source: PubMed Central journal article supplement — Open Heart. 2022 Mar 30;9(1):e001984. doi: 10.1136/openhrt-2022-001984 (PMC8969003; doi:10.1136/openhrt-2022-001984), 2022-03-30
Supplement: openhrt-2022-001984supp001.pdf [file openhrt-2022-001984supp001.pdf]

Supplementary Appendix**External validation of the GRACE risk score and the risk-treatment paradox in acute coronary syndrome patients**

|                          |                                                                                                            |
|--------------------------|------------------------------------------------------------------------------------------------------------|
| Supplementary Figure 1.  | Study flowchart                                                                                            |
| Supplementary Table 1.   | Cause of death specification                                                                               |
| Supplementary Figure 2.  | ROC curve per sex                                                                                          |
| Supplementary Figure 3.  | ROC curve per age category                                                                                 |
| Supplementary Figure 4.  | ROC curve per type of ACS                                                                                  |
| Supplementary Figure 5.  | ROC curve per PRECISE-DAPT score strata                                                                    |
| Supplementary Figure 6.  | Calibration plot per sex                                                                                   |
| Supplementary Figure 7.  | Calibration plot per age category                                                                          |
| Supplementary Figure 8.  | Calibration plot per type of ACS                                                                           |
| Supplementary Figure 9.  | Calibration plot per PRECISE-DAPT score strata                                                             |
| Supplementary Figure 10. | All-cause mortality according to treatment status per GRACE risk score strata including in-hospital deaths |
| Supplementary Table 2.   | Predictors for receiving optimal guideline-recommended care per GRACE risk score strata                    |

**Supplementary Figure 1.** Flowchart of the FORCE-ACS validation cohort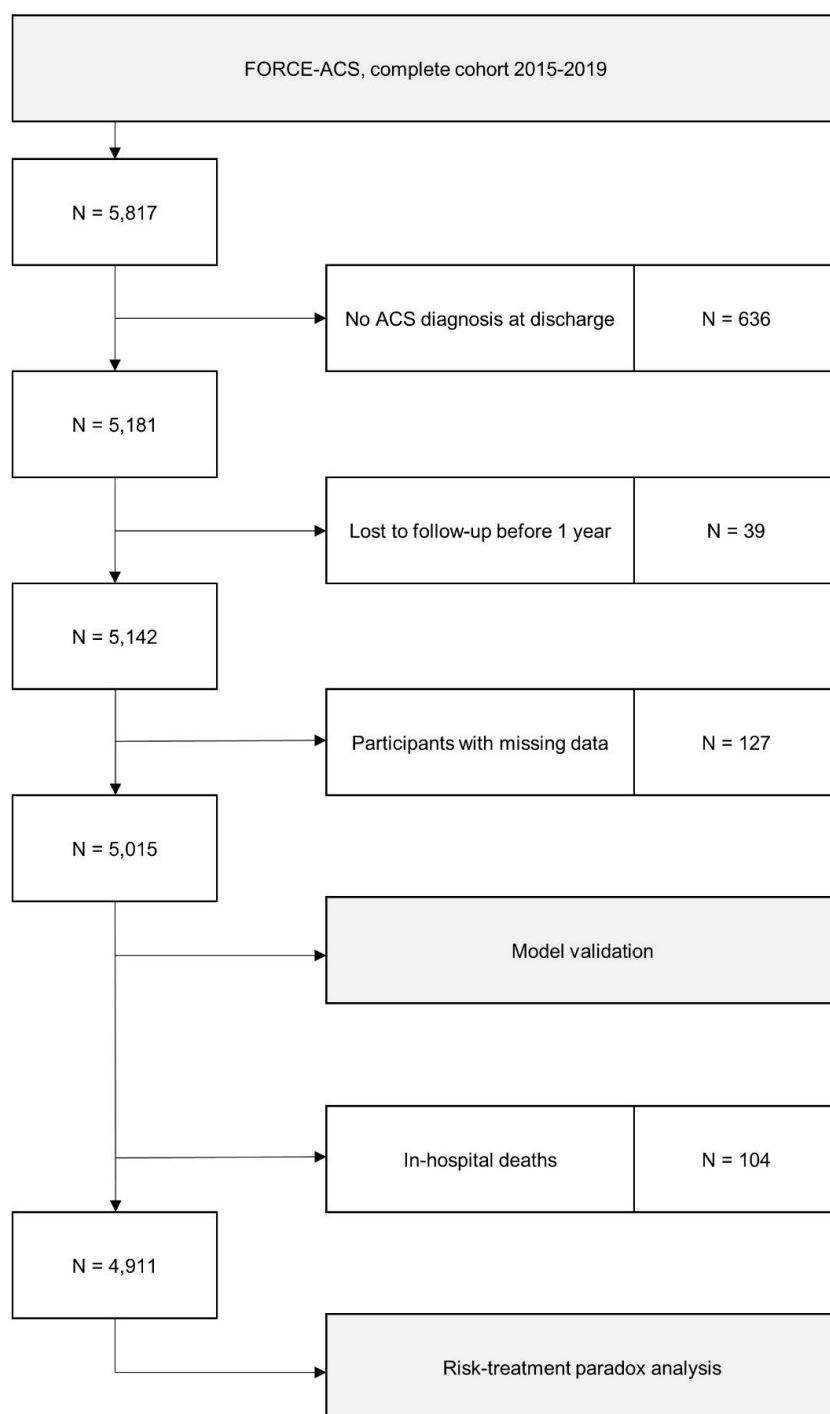

ACS denotes acute coronary syndrome.

**Supplementary Table 1.** Observed rates of in-hospital and one-year mortality specified for cause of death in the FORCE-ACS validation cohort

|                              | N      | No. of events†          |                              |                                  |
|------------------------------|--------|-------------------------|------------------------------|----------------------------------|
|                              |        | All-cause mortality (%) | Cardiovascular mortality (%) | Non-cardiovascular mortality (%) |
| <b>In-hospital mortality</b> | 5,015  | 104 (2.1%)              | 93 (1.9%)                    | 11 (0.2%)                        |
| Men                          | 3,574  | 64 (1.8%)               | 55 (1.5%)                    | 9 (0.3%)                         |
| Women                        | 1,441  | 40 (2.8%)               | 38 (2.6%)                    | 2 (0.1%)                         |
| <75 years                    | 3,586  | 38 (1.1%)               | 35 (1.0%)                    | 3 (0.1%)                         |
| ≥75 years                    | 1,429  | 66 (4.6%)               | 58 (4.1%)                    | 8 (0.6%)                         |
| NSTE-ACS                     | 2,965  | 39 (1.3%)               | 35 (1.2%)                    | 4 (0.1%)                         |
| STE-ACS                      | 2,050  | 65 (3.2%)               | 58 (2.8%)                    | 7 (0.3%)                         |
| PRECISE-DAPT score <25       | 3,408* | 26 (0.8%)               | 24 (0.7%)                    | 2 (0.1%)                         |
| PRECISE-DAPT score ≥25       | 1,510* | 75 (5.0%)               | 66 (4.4%)                    | 9 (0.6%)                         |
| <b>One-year mortality</b>    | 5,015  | 271 (5.4%)              | 204 (4.1%)                   | 67 (1.3%)                        |
| Men                          | 3,574  | 165 (4.6%)              | 119 (3.3%)                   | 46 (1.3%)                        |
| Women                        | 1,441  | 106 (7.4%)              | 85 (5.9%)                    | 21 (1.5%)                        |
| <75 years                    | 3,586  | 90 (2.5%)               | 68 (1.9%)                    | 22 (0.6%)                        |
| ≥75 years                    | 1,429  | 181 (12.7%)             | 136 (9.5%)                   | 45 (3.1%)                        |
| NSTE-ACS                     | 2,965  | 157 (5.3%)              | 116 (3.9%)                   | 41 (1.4%)                        |
| STE-ACS                      | 2,050  | 114 (5.6%)              | 88 (4.3%)                    | 26 (1.3%)                        |
| PRECISE-DAPT score <25       | 3,408* | 63 (1.8%)               | 47 (1.4%)                    | 16 (0.5%)                        |
| PRECISE-DAPT score ≥25       | 1,510* | 200 (13.2%)             | 150 (9.9%)                   | 50 (3.3%)                        |

\* The PRECISE-DAPT score could not be calculated in 97 cases (1.9%).

† Cause of death was assumed to be cardiovascular unless a non-cardiovascular cause could be identified.

NSTE-ACS denotes non-ST-segment elevation acute coronary syndrome and STE-ACS ST-segment elevation acute coronary syndrome.

**Supplementary Figure 2.** Receiver operating characteristic curve of the GRACE risk score for in-hospital and one-year mortality for men and women separately

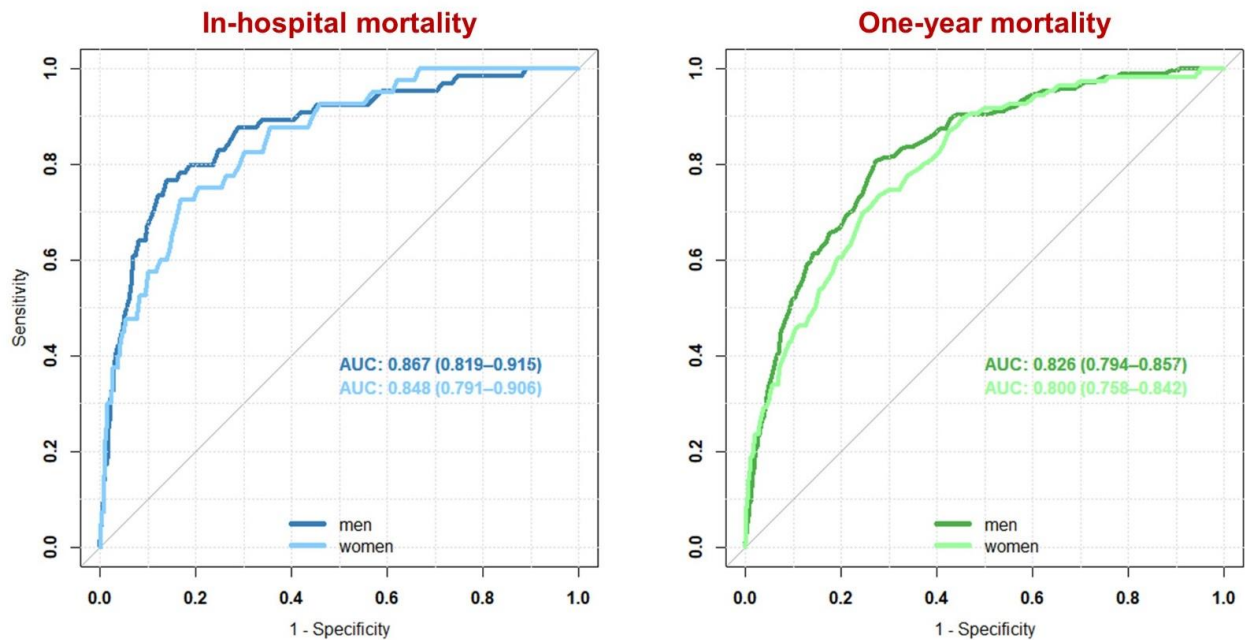

AUC denotes area under the curve.

**Supplementary Figure 3.** Receiver operating characteristic curve of the GRACE risk score for in-hospital and one-year mortality for patients <75 years and ≥75 years separately

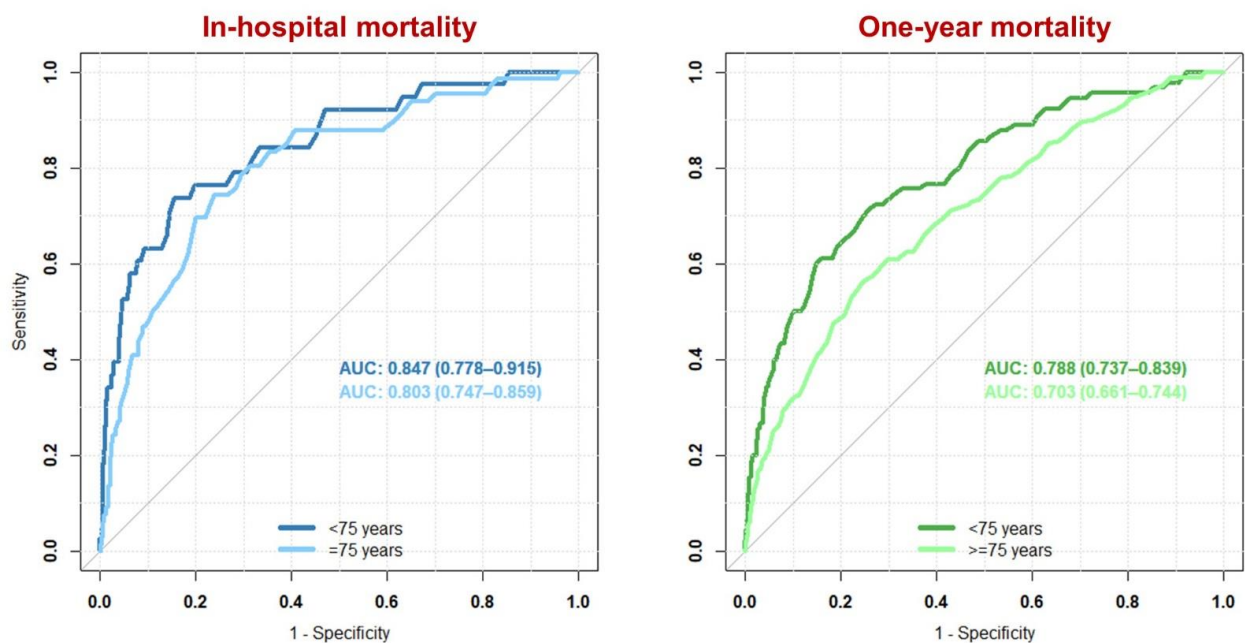

AUC denotes area under the curve.

**Supplementary Figure 4.** Receiver operating characteristic curve of the GRACE risk score for in-hospital and one-year mortality for NSTEMI-ACS and STEMI-ACS patients separately

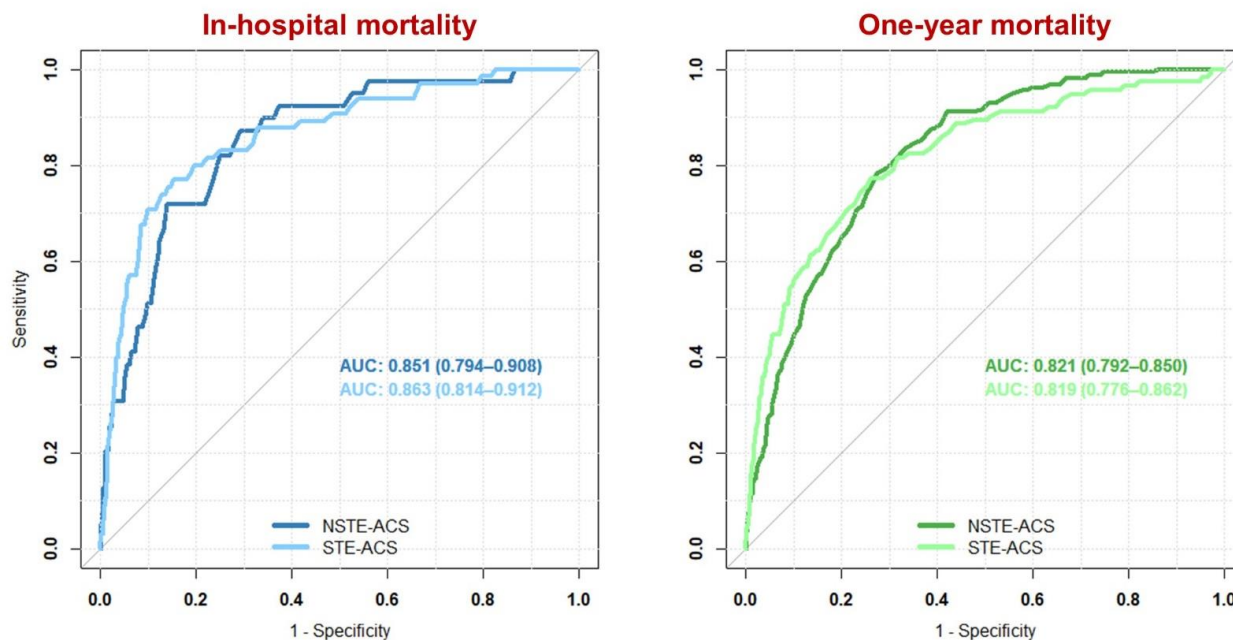

AUC denotes area under the curve, NSTEMI-ACS non-ST-segment elevation acute coronary syndrome and STEMI-ACS ST-segment elevation acute coronary syndrome.

**Supplementary Figure 5.** Receiver operating characteristic curve of the GRACE risk score for in-hospital and one-year mortality for patients without and with a high PRECISE-DAPT score separately

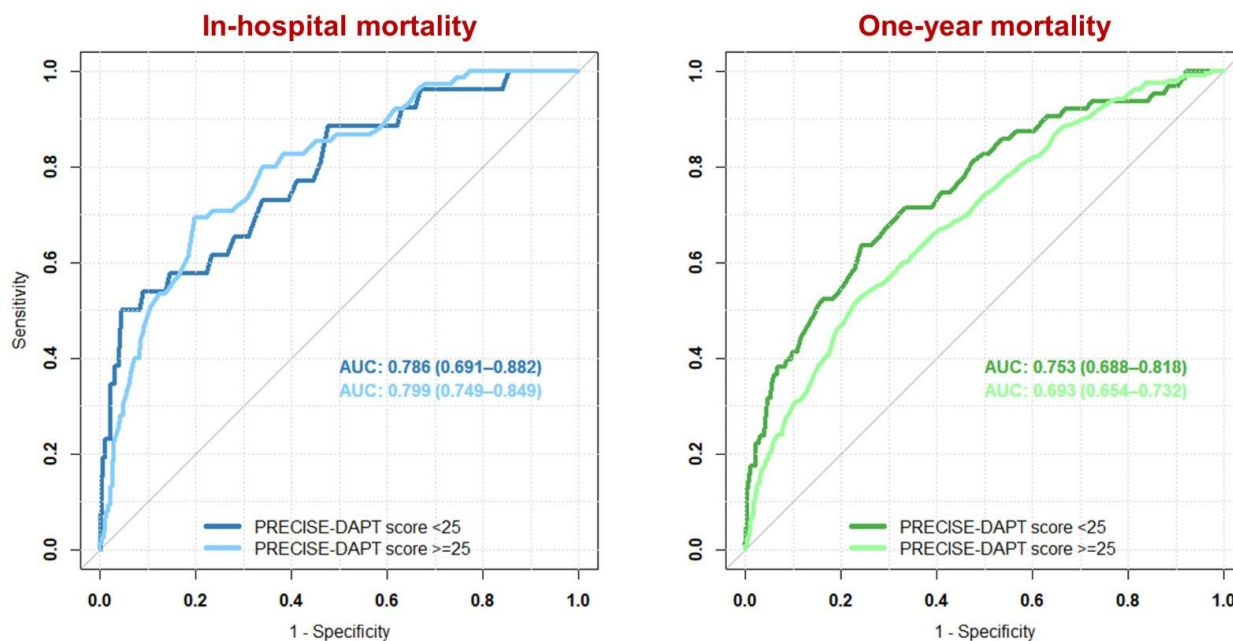

AUC denotes area under the curve.

**Supplementary Figure 6.** Calibration plot of the GRACE risk score for in-hospital and one-year mortality for men and women separately

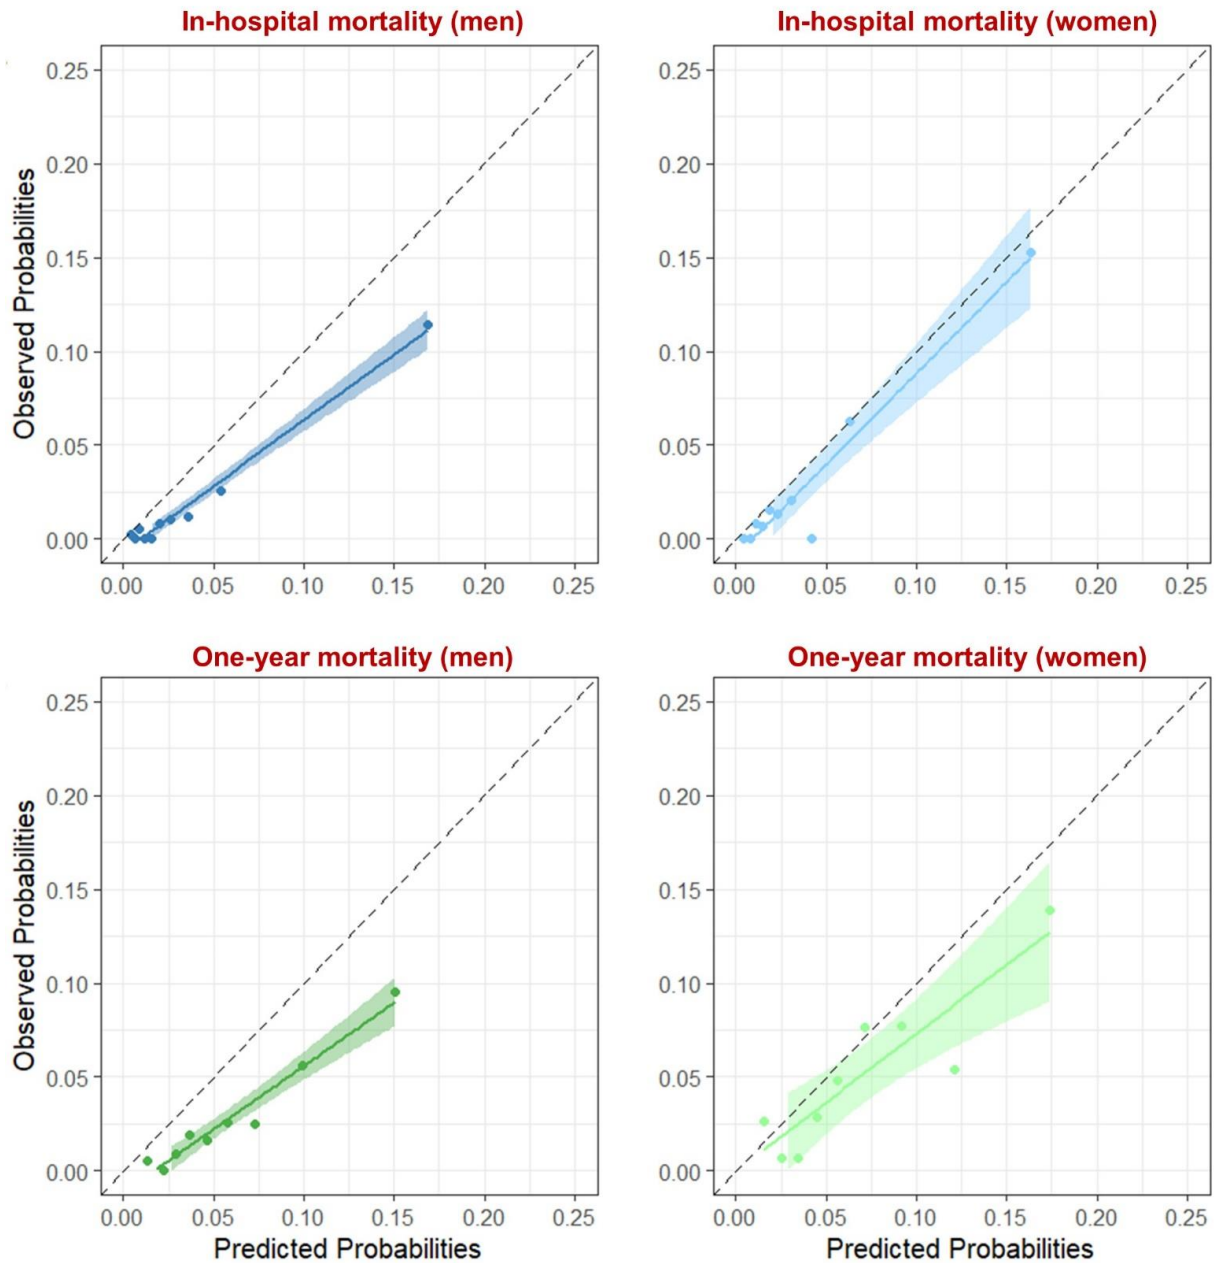

Patients were divided into deciles based on the predicted risk of mortality, each data point represents one decile. The dashed line shows absolute agreement between the observed and predicted rates.

**Supplementary Figure 7.** Calibration plot of the GRACE risk score for in-hospital and one-year mortality for patients <75 years and  $\geq 75$  years separately

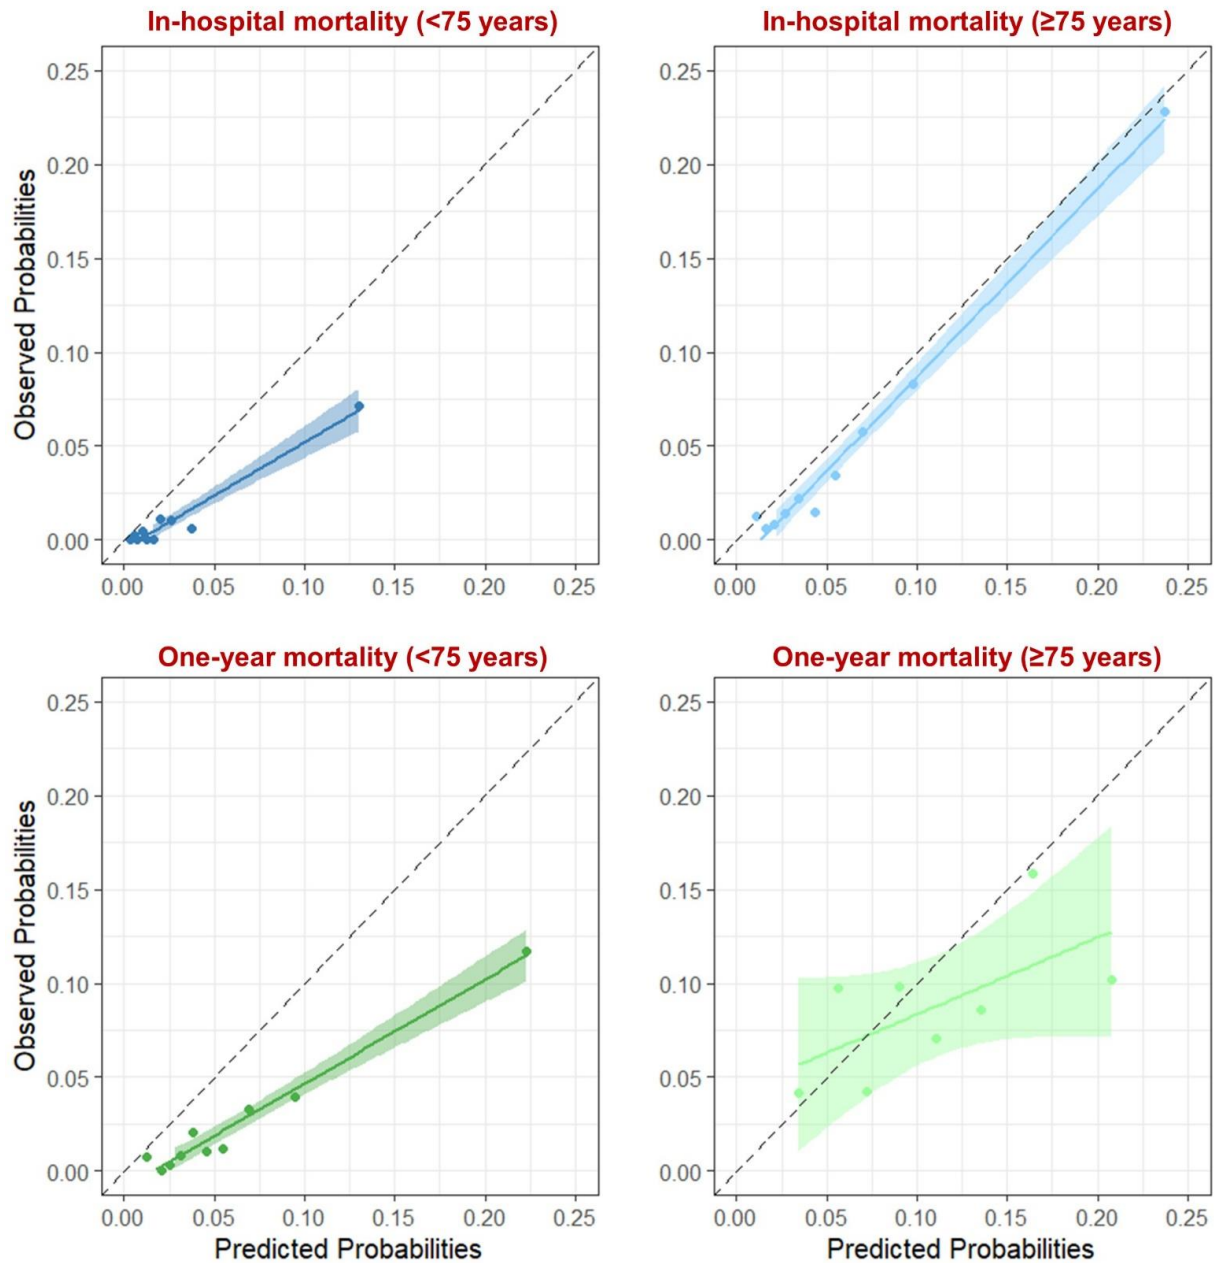

Patients were divided into deciles based on the predicted risk of mortality, each data point represents one decile. The dashed line shows absolute agreement between the observed and predicted rates.

**Supplementary Figure 8.** Calibration plot of the GRACE risk score for in-hospital and one-year mortality for NSTEMI-ACS and STEMI-ACS patients separately

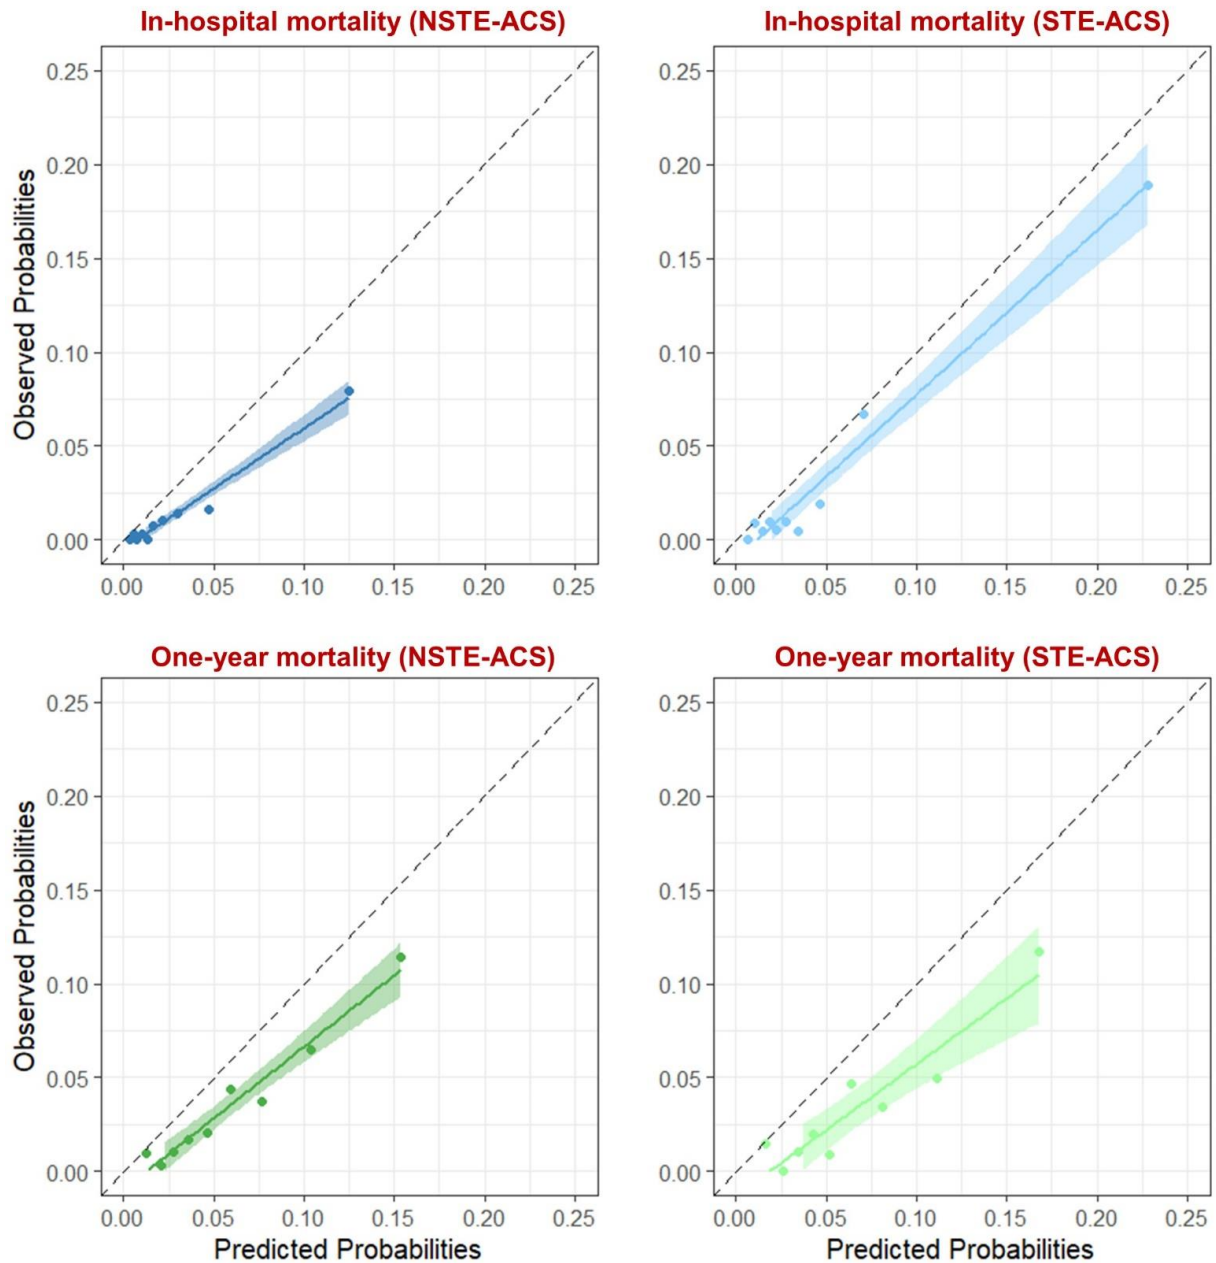

Patients were divided into deciles based on the predicted risk of mortality, each data point represents one decile. The dashed line shows absolute agreement between the observed and predicted rates. NSTEMI-ACS denotes non-ST-segment elevation acute coronary syndrome and STEMI-ACS ST-segment elevation acute coronary syndrome.



**Supplementary Figure 9.** Calibration plot of the GRACE risk score for in-hospital and one-year mortality for patients without and with a high PRECISE-DAPT score separately

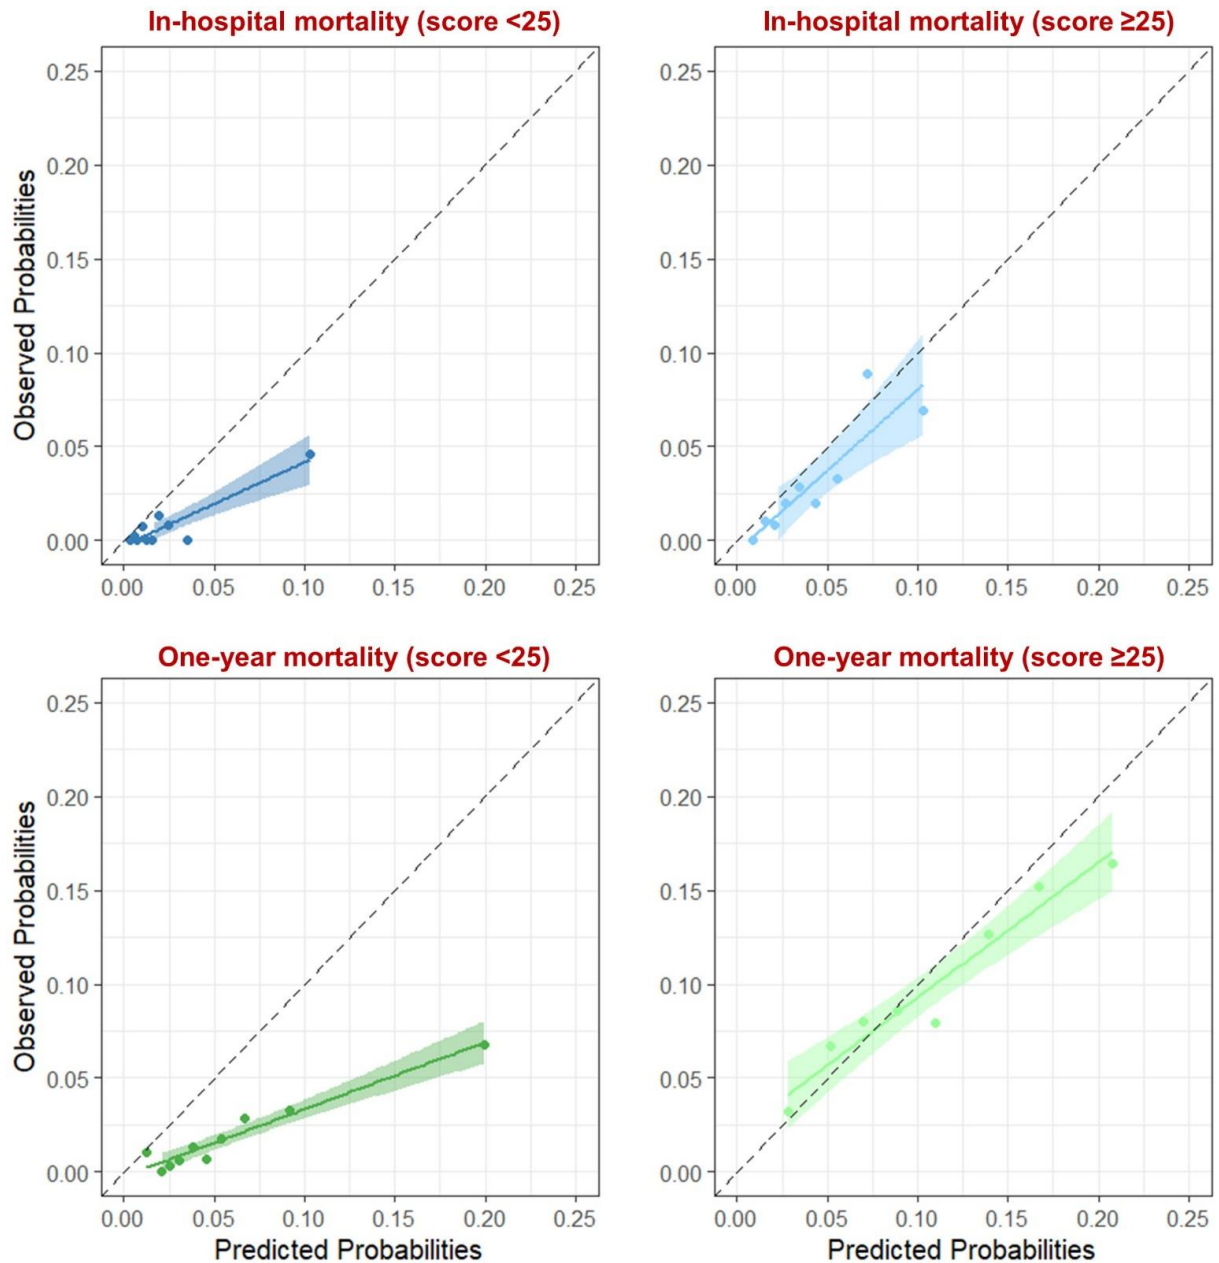

Patients were divided into deciles based on the predicted risk of mortality, each data point represents one decile. The dashed line shows absolute agreement between the observed and predicted rates.

**Supplementary Figure 10.** All-cause mortality according to treatment status for the low-, intermediate- and high-risk categories (sensitivity analysis)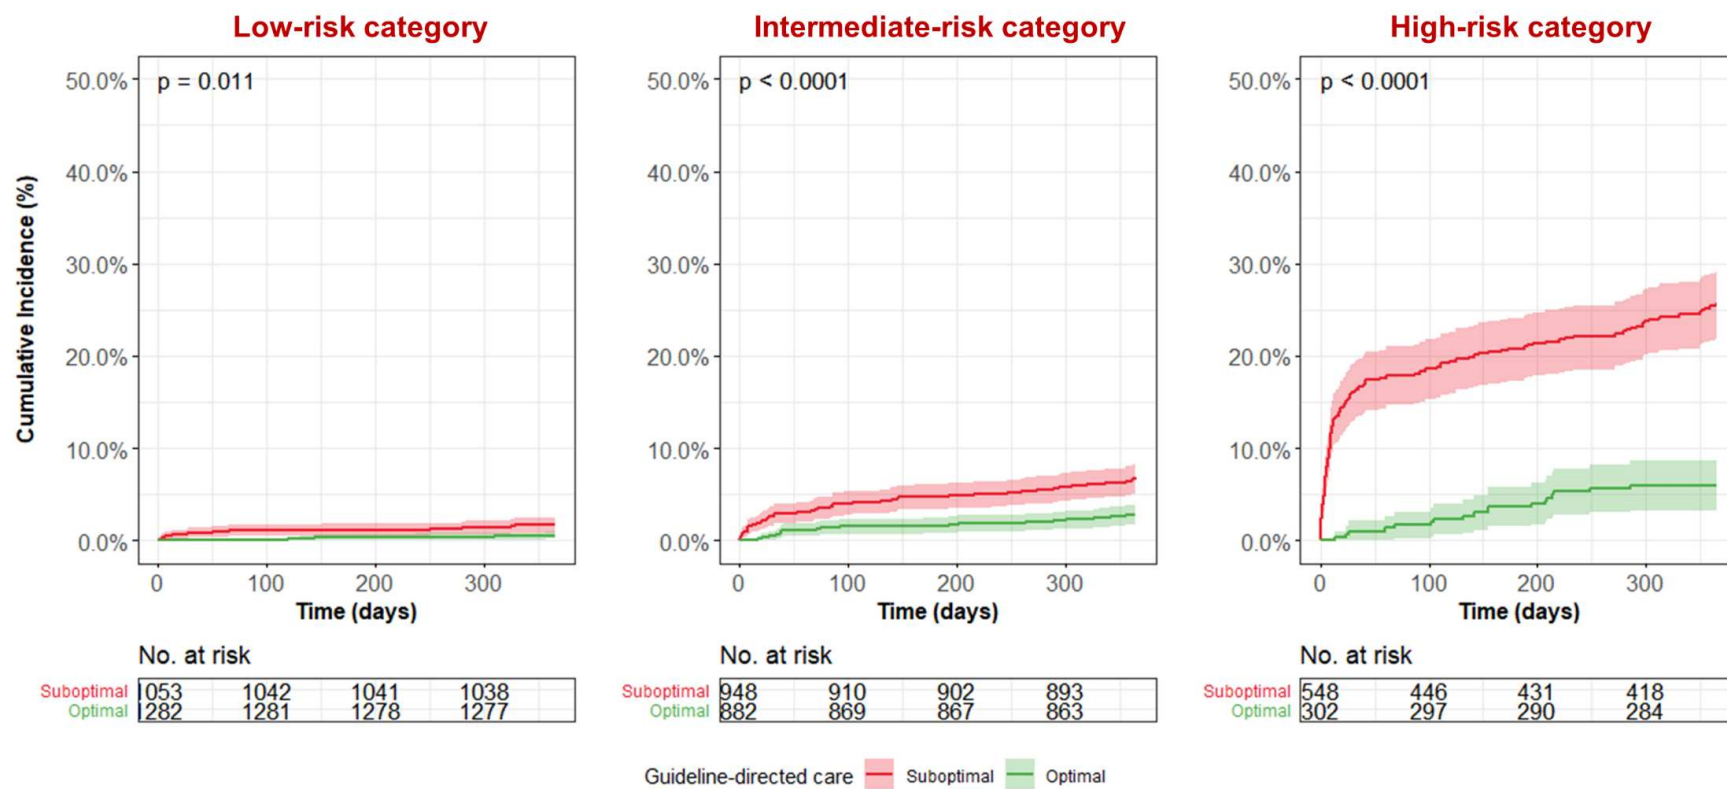

**Supplementary Table 2.** Predictors for receiving optimal guideline-recommended care in the low-, intermediate- and high-risk categories

|                                                        | Low-risk category         |                         | Intermediate-risk category |                         | High-risk category        |                         |
|--------------------------------------------------------|---------------------------|-------------------------|----------------------------|-------------------------|---------------------------|-------------------------|
|                                                        | Unadjusted OR<br>(95%-CI) | Adjusted OR<br>(95%-CI) | Unadjusted OR<br>(95%-CI)  | Adjusted OR<br>(95%-CI) | Unadjusted OR<br>(95%-CI) | Adjusted OR<br>(95%-CI) |
| Age (for each increase of 10 yrs.)                     | 0.84 (0.77-0.92)          | 0.90 (0.81-0.99)        | 0.78 (0.69-0.88)           | -                       | 0.69 (0.59-0.83)          | 0.77 (0.64-0.92)        |
| Female sex                                             | 0.79 (0.66-0.96)          | 0.77 (0.63-0.93)        | 1.07 (0.88-1.31)           | -                       | 0.66 (0.48-0.90)          | 0.68 (0.49-0.96)        |
| Current smoker                                         | 1.08 (0.92-1.28)          | -                       | 1.06 (0.85-1.32)           | -                       | 1.38 (0.90-2.12)          | -                       |
| Hypertension                                           | 1.17 (0.99-1.38)          | -                       | 1.21 (1.00-1.46)           | -                       | 1.15 (0.84-1.56)          | -                       |
| Hyperlipidemia                                         | 1.04 (0.89-1.23)          | -                       | 1.11 (0.92-1.34)           | -                       | 0.80 (0.60-1.07)          | -                       |
| Diabetes mellitus                                      | 0.88 (0.71-1.08)          | -                       | 0.90 (0.72-1.12)           | -                       | 0.94 (0.67-1.33)          | -                       |
| Prior stroke or TIA                                    | 0.79 (0.55-1.14)          | -                       | 0.79 (0.59-1.06)           | -                       | 0.65 (0.42-1.00)          | -                       |
| Prior MI                                               | 0.85 (0.69-1.04)          | -                       | 0.85 (0.68-1.06)           | -                       | 0.85 (0.61-1.17)          | -                       |
| Prior PCI                                              | 0.76 (0.62-0.93)          | -                       | 0.88 (0.71-1.09)           | -                       | 0.67 (0.47-0.96)          | -                       |
| Prior CABG                                             | 0.78 (0.54-1.12)          | -                       | 0.65 (0.48-0.87)           | -                       | 0.73 (0.48-1.11)          | -                       |
| Heart rate (for each increase of 10 bpm)               | 1.13 (1.06-1.18)          | 1.10 (1.05-1.17)        | 1.04 (1.00-1.09)           | -                       | 1.04 (0.99-1.09)          | -                       |
| SBP (for each increase of 10 mmHg)                     | 1.04 (1.01-1.08)          | 1.09 (1.05-1.17)        | 1.02 (0.98-1.05)           | -                       | 1.01 (0.99-1.06)          | -                       |
| Serum creatinine (for each increase of 10 $\mu$ mol/L) | 0.97 (0.93-1.00)          | -                       | 0.96 (0.93-0.99)           | -                       | 0.98 (0.96-1.00)          | -                       |
| STE-ACS diagnosis                                      | 1.77 (1.49-2.11)          | 1.88 (1.55-2.27)        | 2.16 (1.79-2.61)           | 2.16 (1.79-2.61)        | 2.29 (1.70-3.07)          | 2.18 (1.60-2.97)        |
| Cardiac arrest at admission                            | N/A                       | -                       | 1.63 (0.91-2.93)           | -                       | 1.81 (1.21-2.70)          | -                       |
| Cardiogenic shock                                      | N/A                       | -                       | N/A                        | -                       | 2.10 (1.09-4.02)          | -                       |
| PRECISE-DAPT score $\geq 25^*$                         | 0.83 (0.61-1.13)          | -                       | 0.80 (0.66-0.96)           | -                       | 0.65 (0.46-0.91)          | -                       |

Predictors in the adjusted model were selected using forward stepwise selection at an  $\alpha$  of 0.05.

\* PRECISE-DAPT score could not be calculated in 46, 29 and 19 cases in the low-risk, intermediate-risk and high-risk category, respectively.

CABG denotes coronary artery bypass grafting, CI confidence interval, MI myocardial infarction, PCI percutaneous coronary intervention, OR odds ratio, SBP systolic blood pressure, STE-ACS ST-segment elevation acute coronary syndrome and TIA transient ischemic attack.
